# Supplementary material
Source: publisher site journal article supplement (https://www.degruyterbrill.com/publication/isbn/9783110258752/downloadAsset/9783110258752_Inhaltsverzeichnis.pdf)
Supplement: Supplementary file 1 [file 9783110258752_Inhaltsverzeichnis.pdf]

# Inhaltsverzeichnis

## 1 Einführung

|     |                                                      |   |
|-----|------------------------------------------------------|---|
| 1.1 | Lernziele . . . . .                                  | 1 |
| 1.2 | Vorschläge zur Organisation des Praktikums . . . . . | 3 |

## 2 Apparative Grundlagen der synthetischen anorganischen Chemie

|       |                                                                        |    |
|-------|------------------------------------------------------------------------|----|
| 2.1   | Schliff- und Schraubverbindungen . . . . .                             | 5  |
| 2.1.1 | Kegelschliffe (Normschliff) . . . . .                                  | 5  |
| 2.1.2 | Planschliffverbindungen (Flanschverbindungen) . . . . .                | 6  |
| 2.1.3 | Umgang mit Schliffverbindungen . . . . .                               | 6  |
| 2.1.4 | Rohr- und Schlauchverbindungen . . . . .                               | 7  |
| 2.2   | Bauteile für Schliffapparaturen . . . . .                              | 8  |
| 2.2.1 | Reaktionsgefäße . . . . .                                              | 8  |
| 2.2.2 | Kühler . . . . .                                                       | 9  |
| 2.2.3 | Tropftrichter . . . . .                                                | 10 |
| 2.2.4 | Aufsätze und Übergangsstücke . . . . .                                 | 10 |
| 2.2.5 | Rühren . . . . .                                                       | 11 |
| 2.2.6 | Heizen und Kühlen . . . . .                                            | 11 |
| 2.2.7 | Temperaturmessung . . . . .                                            | 11 |
| 2.3   | Standard-Reaktionsapparaturen . . . . .                                | 12 |
| 2.3.1 | Erhitzen unter Rückfluss . . . . .                                     | 12 |
| 2.4   | Einfache Destillation/Rotationsverdampfer . . . . .                    | 14 |
| 2.4.1 | Aufbau und Inbetriebnahme einfacher Destillationsapparaturen . . . . . | 14 |
| 2.4.2 | Rotationsverdampfer . . . . .                                          | 16 |
| 2.5   | Brenner und Öfen . . . . .                                             | 17 |
| 2.6   | Arbeiten mit Gasen . . . . .                                           | 18 |

|   |                                                                                        |    |
|---|----------------------------------------------------------------------------------------|----|
| 3 | Sicherheit im Laboratorium, Entsorgung von Abfällen, Verhalten<br>im Notfall . . . . . | 23 |
|---|----------------------------------------------------------------------------------------|----|

## 4 Präparateteil

### A Elementdarstellungen

|                                                                                 |    |
|---------------------------------------------------------------------------------|----|
| Hintergrund . . . . .                                                           | 25 |
| Präparate A1–A5: allgemeine Versuchsvorschrift für aluminothermische Reaktionen | 27 |

|                                                                                                                                                                                                                                                         |    |
|---------------------------------------------------------------------------------------------------------------------------------------------------------------------------------------------------------------------------------------------------------|----|
| Präparat A1 – Mangan, Mn ( <i>mittel</i> ) . . . . .                                                                                                                                                                                                    | 28 |
| Präparat A2 – Silicium, Si ( <i>mittel</i> ) . . . . .                                                                                                                                                                                                  | 28 |
| Präparat A3 – Bor, B ( <i>mittel</i> ) . . . . .                                                                                                                                                                                                        | 29 |
| Präparat A4 – Eisen, Fe ( <i>mittel</i> ) . . . . .                                                                                                                                                                                                     | 29 |
| Präparat A5 – Kupfer, Cu ( <i>mittel</i> ) . . . . .                                                                                                                                                                                                    | 30 |
| Präparat A6 – Chlor, Cl <sub>2</sub> , und Chlorhydrat, Cl <sub>2</sub> · 7,3 H <sub>2</sub> O ( <i>schwer</i> ) . . . . .                                                                                                                              | 31 |
| Präparat A7 – Bismut, Bi ( <i>leicht</i> ) . . . . .                                                                                                                                                                                                    | 32 |
| Präparat A8 – Antimon, Sb ( <i>mittel</i> ) . . . . .                                                                                                                                                                                                   | 33 |
| <b>B Legierungen</b>                                                                                                                                                                                                                                    |    |
| Hintergrund . . . . .                                                                                                                                                                                                                                   | 34 |
| Präparat B1 – Cu <sub>2</sub> Sb ( <i>leicht</i> ) . . . . .                                                                                                                                                                                            | 36 |
| Präparat B2 – β-SbSn ( <i>leicht</i> ) . . . . .                                                                                                                                                                                                        | 36 |
| Präparat B3 – Cu <sub>3</sub> Sn (ε-Bronze) ( <i>leicht</i> ) . . . . .                                                                                                                                                                                 | 37 |
| Präparat B4 – Cu <sub>2</sub> Zn (α-Messing) ( <i>leicht</i> ) . . . . .                                                                                                                                                                                | 37 |
| Präparat B5 – Cu <sub>5</sub> Zn <sub>8</sub> (γ-Messing) ( <i>leicht</i> ) . . . . .                                                                                                                                                                   | 38 |
| Präparat B6 – Magnesiumsilicid, Mg <sub>2</sub> Si ( <i>mittel</i> ) . . . . .                                                                                                                                                                          | 38 |
| <b>C Synthesen von Festkörpern</b>                                                                                                                                                                                                                      |    |
| Hintergrund . . . . .                                                                                                                                                                                                                                   | 40 |
| Präparat C1 – Borphosphat, BPO <sub>4</sub> ( <i>leicht</i> ) . . . . .                                                                                                                                                                                 | 42 |
| Präparat C2 – Cobaltferrit, CoFe <sub>2</sub> O <sub>4</sub> ( <i>leicht</i> ) . . . . .                                                                                                                                                                | 42 |
| Präparat C3 – Cobaltaluminat ( <i>Thénard's Blau</i> ), CoAl <sub>2</sub> O <sub>4</sub> ( <i>mittel</i> ) . . . . .                                                                                                                                    | 43 |
| Präparat C4 – <i>Rinman's Grün</i> , CoO/ZnO ( <i>mittel</i> ) . . . . .                                                                                                                                                                                | 44 |
| Präparat C5 – Spinell, MgAl <sub>2</sub> O <sub>4</sub> ( <i>mittel</i> ) . . . . .                                                                                                                                                                     | 44 |
| Präparat C6 – Nickelaluminat, NiAl <sub>2</sub> O <sub>4</sub> ( <i>mittel</i> ) . . . . .                                                                                                                                                              | 45 |
| Präparat C7 – Ammonium- <i>trans</i> -diammintetra(thiocyanato- <i>S</i> )-chromat(III)-<br>Monohydrat ( <i>Reinecke-Salz</i> ), NH <sub>4</sub> [Cr(SCN) <sub>4</sub> (NH <sub>3</sub> ) <sub>2</sub> ] · H <sub>2</sub> O ( <i>mittel</i> ) . . . . . | 45 |
| Präparat C8 – Bornitrid, BN ( <i>mittel</i> ) . . . . .                                                                                                                                                                                                 | 46 |
| Präparat C9 – <i>Ägyptisch Blau</i> , CaCu[Si <sub>4</sub> O <sub>10</sub> ] ( <i>schwer</i> ) . . . . .                                                                                                                                                | 46 |
| <b>D Züchtung von Kristallen</b>                                                                                                                                                                                                                        |    |
| Hintergrund . . . . .                                                                                                                                                                                                                                   | 48 |
| Präparat D1 – Kaliumaluminiumsulfat-Dodekahydrat (Aluminiumalaun),<br>KAl(SO <sub>4</sub> ) <sub>2</sub> · 12 H <sub>2</sub> O ( <i>leicht</i> ) . . . . .                                                                                              | 50 |
| Präparat D2 – Kaliumchrom(III)sulfat-Dodekahydrat (Chromalaun)<br>KCr(SO <sub>4</sub> ) <sub>2</sub> · 12 H <sub>2</sub> O ( <i>mittel</i> ) . . . . .                                                                                                  | 51 |
| Präparat D3 – Ammoniumeisen(III)sulfat-Dodekahydrat (Eisenalaun)<br>NH <sub>4</sub> Fe(SO <sub>4</sub> ) <sub>2</sub> · 12 H <sub>2</sub> O ( <i>mittel</i> ) . . . . .                                                                                 | 51 |
| Präparat D4 – Tetraamminkupfer(II)sulfat-Monohydrat,<br>[Cu(NH <sub>3</sub> ) <sub>4</sub> ]SO <sub>4</sub> · H <sub>2</sub> O ( <i>leicht</i> ) . . . . .                                                                                              | 52 |
| Präparat D5 – Kaliumperchlorat, KClO <sub>4</sub> ( <i>mittel</i> ) . . . . .                                                                                                                                                                           | 52 |
| Präparat D6 – Kupfer(II)tartrat-Trihydrat, Cu(C <sub>4</sub> H <sub>4</sub> O <sub>6</sub> ) · 3 H <sub>2</sub> O ( <i>mittel</i> ) . . . . .                                                                                                           | 53 |
| Präparat D7 – Blei(II)iodid, PbI <sub>2</sub> ( <i>mittel</i> ) . . . . .                                                                                                                                                                               | 54 |
| <b>E Koordinationsverbindungen</b>                                                                                                                                                                                                                      |    |
| Hintergrund . . . . .                                                                                                                                                                                                                                   | 55 |
| Präparat E1 – Kaliumtetra(cyanato- <i>N</i> )cobaltat(II), K <sub>2</sub> [Co(NCO) <sub>4</sub> ] ( <i>leicht</i> ) . . . . .                                                                                                                           | 57 |
| Präparat E2 – Tetraammin-(η <sup>2</sup> -carbonato)cobalt(III)nitrat-Hemihydrat,<br>[Co(η <sup>2</sup> -CO <sub>3</sub> )(NH <sub>3</sub> ) <sub>4</sub> ]NO <sub>3</sub> · $\frac{1}{2}$ H <sub>2</sub> O ( <i>mittel</i> ) . . . . .                 | 57 |

|                                                                                                                                                                                               |    |
|-----------------------------------------------------------------------------------------------------------------------------------------------------------------------------------------------|----|
| Präparat E3 – Ammoniumhexachloridoplumbat(IV), $(\text{NH}_4)_2[\text{PbCl}_6]$ ( <i>mittel</i> ) . . . . .                                                                                   | 58 |
| Präparat E4 – Kaliumhexa(thiocyanato- <i>S</i> )chromat(III)-Tetrahydrat,<br>$\text{K}_3[\text{Cr}(\text{SCN})_6] \cdot 4 \text{H}_2\text{O}$ ( <i>mittel</i> ) . . . . .                     | 59 |
| Präparat E5 – Kaliumtrioxalatomanganat(III)-Trihydrat,<br>$\text{K}_3[\text{Mn}(\text{C}_2\text{O}_4)_3] \cdot 3 \text{H}_2\text{O}$ ( <i>schwer</i> ) . . . . .                              | 59 |
| Präparat E6 – Natriumpentacyanidonitroferat(II)-Dihydrat (Nitroprussid-natrium),<br>$\text{Na}_2[\text{Fe}(\text{CN})_5(\text{NO})] \cdot 2 \text{H}_2\text{O}$ ( <i>schwer</i> ) . . . . .   | 60 |
| Präparat E7 – <i>trans</i> -Di(cyanato- <i>N</i> )tetrapyridinnickel(II), $[\text{Ni}(\text{NCO})_2(\text{py})_4]$ ( <i>mittel</i> ) .                                                        | 61 |
| Präparat E8 – Kalium-( $\eta^2$ -peroxido)disulfatotitanat(IV)-Trihydrat,<br>$\text{K}_3[\text{Ti}(\eta^2\text{-O}_2)(\text{SO}_4)_2] \cdot 3 \text{H}_2\text{O}$ ( <i>schwer</i> ) . . . . . | 61 |
| Präparat E9 – Bisacetylacetonatooxidovanadium(IV) (Vanadylacetyl-acetonat),<br>$[\text{VO}(\text{acac})_2]$ , ( <i>schwer</i> ) . . . . .                                                     | 62 |

## F Reaktionen mit Gasen

|                                                                                                                                                                       |    |
|-----------------------------------------------------------------------------------------------------------------------------------------------------------------------|----|
| Hintergrund . . . . .                                                                                                                                                 | 63 |
| Präparat F1 – Natriumhexa(nitrito- <i>N</i> )cobaltat(III), $\text{Na}_3[\text{Co}(\text{NO}_2)_6]$ ( <i>mittel</i> ) . . . . .                                       | 64 |
| Präparat F2 – Ammoniumkupfer(I)tetrasulfid, $(\text{NH}_4)\text{CuS}_4$ ( <i>schwer</i> ) . . . . .                                                                   | 65 |
| Präparat F3 – $\alpha$ -Mangansulfid, $\text{MnS}$ ( <i>schwer</i> ) . . . . .                                                                                        | 66 |
| Präparat F4 – Kupfer(I)tetraiodidomercurat(II), $\text{Cu}_2[\text{HgI}_4]$ ( <i>mittel</i> ) . . . . .                                                               | 66 |
| Präparat F5 – <i>trans</i> -Tetraammin-di(nitrito- <i>N</i> )cobalt(III)-chlorid,<br>$[\text{Co}(\text{NO}_2)_2(\text{NH}_3)_4]\text{Cl}$ ( <i>schwer</i> ) . . . . . | 67 |
| Präparat F6 – Eisen(III)oxidhydroxid (Goethit), $\alpha\text{-FeO}(\text{OH})$ ( <i>mittel</i> ) . . . . .                                                            | 68 |
| Präparat F7 – Lithiumnitrid, $\text{Li}_3\text{N}$ ( <i>mittel</i> ) . . . . .                                                                                        | 68 |

## G Molekulare Verbindungen der p-Block-Elemente

|                                                                                                                   |    |
|-------------------------------------------------------------------------------------------------------------------|----|
| Hintergrund . . . . .                                                                                             | 70 |
| Präparat G1 – Antimon(III)iodid, $\text{SbI}_3$ ( <i>leicht</i> ) . . . . .                                       | 71 |
| Präparat G2 – Kaliumtetrathionat, $\text{K}_2\text{S}_4\text{O}_6$ ( <i>mittel</i> ) . . . . .                    | 72 |
| Präparat G3 – Thiocyan säure, $\text{HSCN}$ und Cobalt(II)thiocyanat, $\text{Co}(\text{SCN})_2$ ( <i>mittel</i> ) | 73 |
| Präparat G4 – Kaliumperoxodisulfat, $\text{K}_2\text{S}_2\text{O}_8$ ( <i>schwer</i> ) . . . . .                  | 73 |
| Präparat G5 – Borsäuretrimethylester, $\text{B}(\text{OCH}_3)_3$ ( <i>schwer</i> ) . . . . .                      | 74 |

## H Polyoxoanionen

|                                                                                                                                                                                   |    |
|-----------------------------------------------------------------------------------------------------------------------------------------------------------------------------------|----|
| Hintergrund . . . . .                                                                                                                                                             | 76 |
| Präparat H1 – Ammonium-6-molybdoniccolat(II)-Pentahydrat,<br>$(\text{NH}_4)_4[\text{NiMo}_6\text{O}_{24}\text{H}_6] \cdot 5 \text{H}_2\text{O}$ ( <i>leicht</i> ) . . . . .       | 78 |
| Präparat H2 – Ammonium-10-vanadodimanganat(II)-Dodekahydrat,<br>$(\text{NH}_4)_2[\text{Mn}_2\text{V}_{10}\text{O}_{28}] \cdot 12 \text{H}_2\text{O}$ ( <i>leicht</i> ) . . . . .  | 78 |
| Präparat H3 – Ammonium-10-molybdodicobaltat(III)-Dekahydrat,<br>$(\text{NH}_4)_6[\text{Co}_2\text{Mo}_{10}\text{O}_{36}] \cdot 10 \text{H}_2\text{O}$ ( <i>mittel</i> ) . . . . . | 79 |
| Präparat H4 – <i>Kurrol'sches</i> Natriumpolyphosphat, $(\text{NaPO}_3)_x$ ( <i>mittel</i> ) . . . . .                                                                            | 79 |
| Präparat H5 – 12-Wolframophosphorsäure-Hydrat,<br>$\text{H}_3[\text{PW}_{12}\text{O}_{40}] \cdot x \text{H}_2\text{O}$ ( <i>schwer</i> ) . . . . .                                | 80 |

## I Verbindungen mit Nanostrukturen

|                                                                                         |    |
|-----------------------------------------------------------------------------------------|----|
| Hintergrund . . . . .                                                                   | 81 |
| Präparat I1 – Schwefelsol ( <i>mittel</i> ) . . . . .                                   | 83 |
| Präparat I2 – Sol von $\text{Fe}(\text{OH})_3$ ( <i>leicht</i> ) . . . . .              | 83 |
| Präparat I3 – Sol von $\text{Sb}_2\text{S}_3$ ( <i>mittel</i> ) . . . . .               | 84 |
| Präparat I4 – Zeolith A ( <i>mittel</i> ) . . . . .                                     | 85 |
| Präparat I5 – NaBr-Sodalith ( <i>mittel</i> ) . . . . .                                 | 86 |
| Präparat I6 – Titandioxid ( $\text{TiO}_2$ ) – Nanopartikel ( <i>mittel</i> ) . . . . . | 87 |

|                                                                                                                                 |    |
|---------------------------------------------------------------------------------------------------------------------------------|----|
| K Großtechnische Verfahren im Laboratoriumsmaßstab                                                                              |    |
| Hintergrund . . . . .                                                                                                           | 88 |
| Versuch K1 – Das <i>Solvay</i> -Verfahren ( <i>schwer</i> ) . . . . .                                                           | 90 |
| Versuch K2 – Der Hochofenprozess ( <i>schwer</i> ) . . . . .                                                                    | 91 |
| Versuch K3 – Das Kontaktverfahren ( <i>schwer</i> ) . . . . .                                                                   | 92 |
| Versuch K4 – Das <i>Ostwald</i> -Verfahren ( <i>schwer</i> ) . . . . .                                                          | 93 |
| Versuch K5 – Der <i>Deacon</i> -Prozess ( <i>schwer</i> ) . . . . .                                                             | 94 |
| Versuch K6 – Das <i>Bayer</i> -Verfahren ( <i>mittel</i> ) . . . . .                                                            | 95 |
| Versuch K7 – Die Kupferraffination ( <i>mittel</i> ) . . . . .                                                                  | 96 |
| Sachregister . . . . .                                                                                                          | 99 |
| Zusatzmaterial online unter //URL <a href="http://www.degruyter.com/9783110258745">http://www.degruyter.com/9783110258745</a> . |    |
| – Geräteliste                                                                                                                   |    |
| – Betriebsanweisung                                                                                                             |    |
| – Chemikalienliste                                                                                                              |    |
| – Pulverdiffraktogramme                                                                                                         |    |
| – IR-Spektren                                                                                                                   |    |
| – Farbfotos der Feststoffpräparate                                                                                              |    |
